# Supplementary material for: Construction of a sequentially responsive nanocarrier for chemotherapy and cascade amplified NIR photodynamic therapy
Source: Royal Society of Chemistry journal article supplement (doi:10.1039/d1cc05122a), 2021-12-27
Supplement: d1cc05122a1.pdf [file d1cc05122a1.pdf]

# 1 Supporting Information

## 2 Construction of a sequentially responsive nanocarrier for chemotherapy and cascade 3 amplified NIR photodynamic therapy

4

5 Tao Yan, Linlin Ren, Fengyan Li, Feng Tian, Chengfang Jiang, Qi Wang, Xinyue Song\* and  
6 Shusheng Zhang\*

7 Shandong Provincial Key Laboratory of Detection Technology for Tumor Markers, College of  
8 Chemistry and Chemical Engineering, Linyi University, Linyi 276005, P. R. China.

9 Corresponding author email: [songxinyue428@163.com](mailto:songxinyue428@163.com); [shushzhang@126.com](mailto:shushzhang@126.com)

10

## 11 Contents

|    |                                                                                                |    |
|----|------------------------------------------------------------------------------------------------|----|
| 12 | 1. Materials .....                                                                             | 2  |
| 13 | 2. Experimental Apparatus .....                                                                | 2  |
| 14 | 3. Preparation of the upconversion nanotheranostic agent .....                                 | 3  |
| 15 | 3.1 Preparation of UCNPs .....                                                                 | 3  |
| 16 | 3.2 Preparation of mesoporous silica coated UCNPs (UCNPs@mSiO <sub>2</sub> ).....              | 4  |
| 17 | 3.3 Preparation of photodynamic nanotheranostic agent (UCNPs@mSiO <sub>2</sub> /MB).....       | 5  |
| 18 | 3.4 Preparation of UCNPs@mSiO <sub>2</sub> /MB@PAH.....                                        | 7  |
| 19 | 3.5 DNA sequence.....                                                                          | 8  |
| 20 | 3.6 Construction of DOX molecules loaded DNA duplex .....                                      | 8  |
| 21 | 3.7 Scheme of the DNA nanoshell/DOX.....                                                       | 9  |
| 22 | 3.8 Design of the nanotheranostic agent UCNPs@mSiO <sub>2</sub> /MB@PAH@DNA nanoshell/DOX..... | 9  |
| 23 | 3.9 Stability and hemocompatibility of the prepared nanomaterials .....                        | 10 |
| 24 | 3.10 Fluorescence calibration curve of DOX molecules .....                                     | 11 |
| 25 | 4. In vitro performance evaluation of the prepared nanotheranostic agent .....                 | 12 |
| 26 | 4.1 ATP and GSH induced the release of loaded DOX molecules .....                              | 12 |
| 27 | 4.2 Detection of the produced ROSs in aqueous solution .....                                   | 14 |
| 28 | 5. Cell experiment.....                                                                        | 15 |
| 29 | 5.1 Cell culture .....                                                                         | 15 |
| 30 | 5.2 Stability and biocompatibility of the prepared nanotheranostic agent .....                 | 16 |
| 31 | 5.3 Cellular uptake and localization of the prepared nanotheranostic agent .....               | 17 |
| 32 | 5.4 Intracellular DOX release .....                                                            | 18 |
| 33 | 5.5 In vitro ROSs generation .....                                                             | 19 |
| 34 | 5.6 Cell apoptosis assay in living cells .....                                                 | 20 |
| 35 | 6. Animal experiment .....                                                                     | 21 |
| 36 | 6.1 Obtain the tumor-bearing model.....                                                        | 21 |
| 37 | 6.2 In vivo biodistribution and metabolism of the prepared nanotheranostic agent.....          | 22 |
| 38 | 6.3 In vivo therapeutic efficacy assay .....                                                   | 23 |
| 39 | Reference .....                                                                                | 24 |
| 40 |                                                                                                |    |

## 41 **1. Materials**

42 Materials for preparation of upconversion nanoparticles including rare earth oxides (purities  
43 large than 99.99%), sodium fluoride (NaF), 1-octadecene (ODE) and oleic acid (OA) were  
44 purchased from the Aladdin Reagent, Ltd. (Shanghai, China). The Sinopharm Chemical  
45 Reagent Co., Ltd. (Shanghai, China) provided the rest chemical reagents of analytical grade. All  
46 sample solution was prepared by purified water from an OKP purification system. The animal  
47 experiments were supervised under the Animal Care and Use Committee of Linyi University.

## 48 **2. Experimental Apparatus**

49 The size and morphology of the prepared UCNPs were observed with the transmission electron  
50 microscope (TEM, model: JEM-2010, JEOL) while their crystal structure was obtained with  
51 the X-ray powder diffractometer. EDS 2D mapping analysis was achieved on STEM (mode:  
52 FEI TalosF200x). An external 980 continuous-wave laser was used to provide the excitation  
53 light for the prepared UCNPs and then their fluorescence information was recorded with the  
54 fluorescence spectrophotometer (mode: F-4600, Hitachi). Fluorescence lifetime measurements  
55 were performed with the near infrared fluorescence and phosphorescence spectrometer (FLS  
56 980-STM, Edinburgh Instruments Ltd., Livingston, United Kingdom). Electron spin resonance  
57 analysis was used to observe the generation of reactive oxygen species. The characteristic UV  
58 absorption peaks and  $\zeta$  potential of the prepared upconversion nanotheranostic agents were  
59 analyzed with the Uv-Vis spectrophotometer (model: Cary 60, Agilent) and the Zeta-size nano  
60 instrument (Zen 3600, Malvern Instruments Ltd.), respectively. The fluorescent information in  
61 the living cells was obtained with the Leica TCS SP5 confocal lasers scanning microscope. The  
62 cytotoxicity and hemocompatibility of the prepared nanomaterials were evaluated by the  
63 corresponding assay kits assisted with the Microplate Reader (Thermo Scientific Multi-skan  
64 Mk3). The cellular apoptosis experiment was achieved on the Flow Cytometry (Beckman  
65 Coulter, Inc.). The IVIS Lumina Series III was used to study the *in vivo* biodistribution and  
66 metabolism of the prepared nanotheranostic agent.

### 67 3. Preparation of the upconversion nanotheranostic agent

#### 68 3.1 Preparation of UCNPs

69 UCNPs with three separate luminescence peaks were obtained with the structure of  
70  $\text{NaYF}_4@\text{NaYF}_4,\text{Yb:Tm}@\text{NaYF}_4,\text{Yb:Er}@\text{NaYF}_4$  and the adjacent two luminescence layers  
71 doped with  $\text{Tm}^{3+}$  and  $\text{Er}^{3+}$ , respectively, was used to increase the luminescence efficiency. The  
72 multi-color UCNPs were prepared via the seed-mediated layer-by-layer growth method in this  
73 experiment. Firstly, the Yttrium oleate ( $\text{Y}(\text{oleate})_3$ ) was obtained according to the followed  
74 procedure. Yttrium oxide  $\text{Y}_2\text{O}_3$  (5.0 mmol) were dissolved in 30 mL of concentrated  
75 hydrochloric acid (HCl), reacted at  $60^\circ\text{C}$  for overnight and evaporated to acquire the solid  $\text{YCl}_3$ .  
76 The obtained  $\text{YCl}_3$  was subsequently mixed with 20 mmol sodium oleate, then reacted in the  
77 solvent consisting of ethanol, ultrapure water and hexane with volume ratio of 4:3:7. The  
78 Yttrium oleate ( $\text{Y}(\text{oleate})_3$ ) was obtained via refluxing at  $70^\circ\text{C}$  for 6h, washed with ultrapure  
79 water by the separatory funnel and evaporated to remove the hexane.<sup>1</sup> The lanthanide oleate  
80 complex ( $\text{Ln}(\text{oleate})_3$ ) were obtained in the same way and the molar ratio was optimized to be  
81  $\text{Y:Yb:Tm}=59.5:40:0.5$  and  $\text{Y:Yb:Er}=80:18:2$ , respectively. Then, 20 mmol NaF and 0.5 mmol  
82  $\text{Y}(\text{oleate})_3$  was added into 20 mL OA/ODE mixing solution ( $V:V=1:1$ ), the mixture solution  
83 was heated to  $110^\circ\text{C}$  and reacted for 60 min under the protection of argon (Ar), then further  
84 heated to  $320^\circ\text{C}$  and reacted for another 90 min to form  $\text{NaYF}_4$  core. Then, 0.8 mmol  $\text{Ln}(\text{oleate})_3$   
85 ( $\text{Y:Yb:Tm}=59.5:40:0.5$ ) was injected into the above reaction solution and reaction at  $320^\circ\text{C}$  for  
86 another 20 min to form the first luminescent shell on the surface of  $\text{NaYF}_4$  core. And then, the  
87 same amount of  $\text{Ln}(\text{oleate})_3$  ( $\text{Y:Yb:Er}=80:18:2$ ) was injected and reacted for 20 min to grow  
88 the second luminescent shell. After that, 0.6 mmol  $\text{Y}(\text{oleate})_3$  was injected into the above  
89 mixture solution and reacted for another 20 min to grow the outer protection layer. Finally, the  
90 reaction mixture was cooled to the room temperature. The prepared multi-color UCNPs was

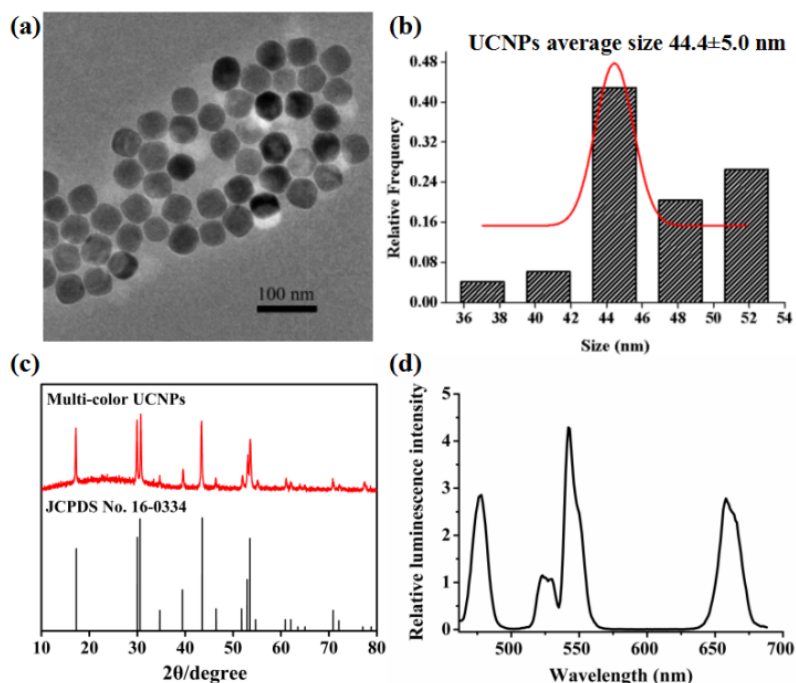

91 precipitated by two-fold volume of ethanol, centrifugally collected, washed with  
92 hexane/ethanol ( $V:V=1:6$ ) for several times and dispersed in hexane for further use.

93 Figure S1: (a) transmission electron microscope (TEM) image; (b) size distribution; (c) X-ray diffraction  
94 (XRD) images; (d) relative luminescence intensity of the prepared multi-color UCNP.

### 95 **3.2 Preparation of mesoporous silica coated UCNP (UCNP@mSiO<sub>2</sub>)**

96 Usually, there were two commonly-used methods to synthesize the UCNP@mSiO<sub>2</sub>. The first  
97 method is to directly coat mSiO<sub>2</sub> layers on the surface of UCNP in one step while the second  
98 method is to coat mSiO<sub>2</sub> layers on the surface of dense silica coated UCNP (UCNP@dSiO<sub>2</sub>)  
99 to synthesize the UCNP@dSiO<sub>2</sub>@mSiO<sub>2</sub> with the structure of core@shell@shell.<sup>2</sup> Shi et al.  
100 group reported the direct fabrication of mSiO<sub>2</sub> layers with thickness of around 20-100 nm on  
101 the hydrophobic surface of UCNP using temperature-controlled ultrasonication treatment  
102 which needed to finely control the reaction parameters such as the added amount and rate of  
103 the silica precursor, pH of the reaction mixture and added sequence of reagent.<sup>3</sup> Here we  
104 developed a novel and feasible method to prepare UCNP@mSiO<sub>2</sub> with thin thickness. Firstly,  
105 hydrophilic bared UCNP was prepared by the acid-treatment. Oleic acid protected UCNP (20  
106 mg) was centrifugated, then dispersed in 20 mL of acidic ethanol solution (pH=1) and  
107 ultrasonicated for 1 h to remove the surface oleate ligand. The obtained bared UCNP were  
108 collected after washed with ethanol and dispersed in ultrapure water for further use. Then, the  
109 surfactant, hexadecyltrimethylammonium chloride (CTAC, 1.0 g) and organic base,  
110 triethanolamine (0.01 g), were mixed into 10 mL of ultrapure water and stirred for 90 min. After  
111 that, 20 mg bared UCNP was added dropwise and reacted for another 90 min. Subsequently,  
112 the silica precursor, tetraethyl orthosilicate (TEOS, 80  $\mu$ L) was slowly added and reacted at  
113 80°C for 90 min to grow a homogeneous silica layer on the surface of UCNP. To obtain the  
114 mesoporous silica, the surfactant CTAC was removed with the developed substitution method.  
115 Briefly, the above silica layer coated UCNP was collected by centrifugation, added into 1 wt%  
116 solution of sodium chloride (NaCl) in ethanol (30 mL) and stirred for overnight. Then,  
117 nanoparticles was obtained after centrifugation and washed with ethanol for twice. The above  
118 substitution process in ethanol solution containing 1.0 wt % of NaCl was repeated twice and  
119 each process lasted for 3 h for the complete substitution of surfactant CTAC. Finally, the  
120 obtained UCNP@mSiO<sub>2</sub> was dispersed in 5.0 mL of ultrapure water for further use.

121 The prepared UCNP@mSiO<sub>2</sub> was characterized with EDS 2D mapping analysis. As  
122 shown in Figure S2 showed that Na<sup>+</sup> and Y<sup>+</sup> ions distributed mainly in the inner UCNP core  
123 while Si<sup>4+</sup> distributed mainly in the outer shell, proving the successful preparation of the core-  
124 shell structured UCNP@mSiO<sub>2</sub> nanoprobe.

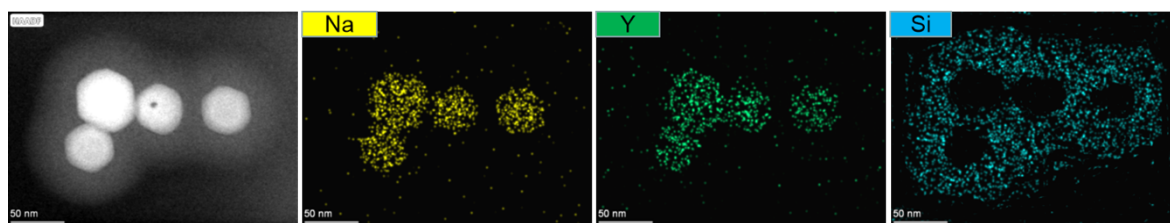

125

126 Figure S2: EDS 2D mapping of the distribution of Na<sup>+</sup>, Y<sup>3+</sup> and Si<sup>4+</sup> in the prepared UCNPs@mSiO<sub>2</sub>  
 127 nanoprobe.

### 128 3.3 Preparation of photodynamic nanotheranostic agent (UCNPs@mSiO<sub>2</sub>/MB)

129 In this experiment, photosensitizer, methylene blue (MB), was loaded into the mesoporous  
 130 silica to prepare the upconversion photodynamic nanotheranostic agent (UCNPs@mSiO<sub>2</sub>/MB).  
 131 Briefly, MB aqueous solution (250 μL, 1.0 mg/mL) was added into UCNPs@mSiO<sub>2</sub> aqueous  
 132 solution (10 mL, 1.0 mg/mL) and then stirred for overnight at room temperature. The prepared  
 133 UCNPs@mSiO<sub>2</sub>/MB (1.0 mg/mL) was stored in ultrapure water after washed with water and  
 134 HEPES buffer solution for several times to remove excess MB molecules.

135 The successful loading of MB into the prepared UCNPs@mSiO<sub>2</sub> nanoprobe was further  
 136 validated by the ζ-potential analysis and Uv-Vis spectrometer analysis. The prepared  
 137 UCNPs@mSiO<sub>2</sub>/MB showed an increase in ζ-potential from -32.8 mV to -14.9 mV (Figure S3a)  
 138 and displayed the characteristic Uv-Vis absorption peak of MB molecules (Figure S3b). In  
 139 addition, the prepared UCNPs@mSiO<sub>2</sub>/MB nanoprobe could keep the well distribution (Figure  
 140 S3c).

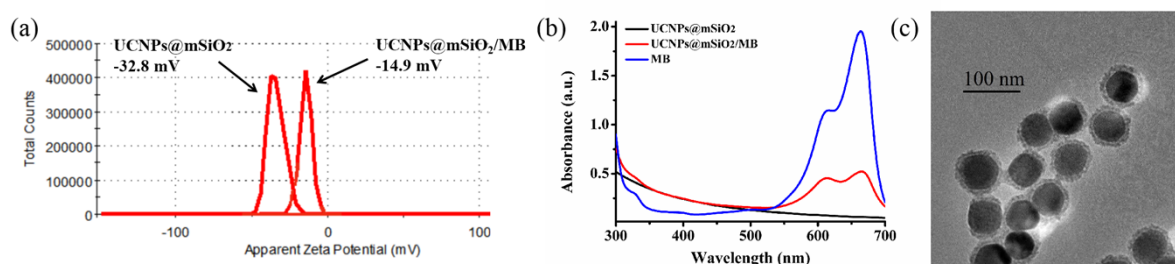

141

142 Figure S3: (a) ζ-potential analysis of UCNPs@mSiO<sub>2</sub> and UCNPs@mSiO<sub>2</sub>/MB; (b) Uv-Vis of  
 143 UCNPs@mSiO<sub>2</sub>, UCNPs@mSiO<sub>2</sub>/MB and MB molecules; (c) TEM image of UCNPs@mSiO<sub>2</sub>/MB.

144 The energy transfer efficiency between UCNPs and MB molecules was evaluated with the  
 145 luminescence lifetime assay.<sup>4</sup> Fluorescence lifetime measurements were performed using with  
 146 the near infrared fluorescence and phosphorescence spectrometer (FLS 980-STM, Edinburgh).  
 147 The decay curves were mono- to tetra- exponentially fitted using reconvolution fit analysis with  
 148 following equation included in FLS-980 software. The fitting formula is:

149

$$R(t) = A + B_1 e^{(-t/\tau_1)} + B_2 e^{(-t/\tau_2)} + B_3 e^{(-t/\tau_3)} + B_4 e^{(-t/\tau_4)}$$

150 where  $t$  is time,  $A$  is a constant background,  $B_1$ ,  $B_2$ ,  $B_3$ , and  $B_4$  are fractional intensities,  $\tau_1$ ,  $\tau_2$ ,  
151  $\tau_3$ , and  $\tau_4$  are fluorescence lifetimes. The amplitude-weighted average fluorescence lifetime  $\langle\tau\rangle$   
152 is calculated from following equation:

$$153 \quad \langle\tau\rangle = (B_1\tau_1^2 + B_2\tau_2^2 + B_3\tau_3^2 + B_4\tau_4^2) / (B_1\tau_1 + B_2\tau_2 + B_3\tau_3 + B_4\tau_4)$$

154 The luminescence lifetimes of UCNPs@mSiO<sub>2</sub>/MB and UCNPs@mSiO<sub>2</sub> at emission  
155 wavelength of 659 nm were detected to be 183.35  $\mu$ s ( $\chi^2=1.140$ ) and 269.22  $\mu$ s ( $\chi^2=1.300$ ),  
156 respectively. According to the equation  $E = (1 - \tau_1/\tau_2) \times 100\%$ , where  $\tau_1$  and  $\tau_2$  represented for the  
157 luminescence lifetime of UCNPs@mSiO<sub>2</sub>/MB and UCNPs@mSiO<sub>2</sub>, respectively, the  
158 calculated energy transfer efficiency between UCNPs and MB molecules was 31.90%, which  
159 was comparable to the reported energy transfer efficiency.<sup>5</sup>

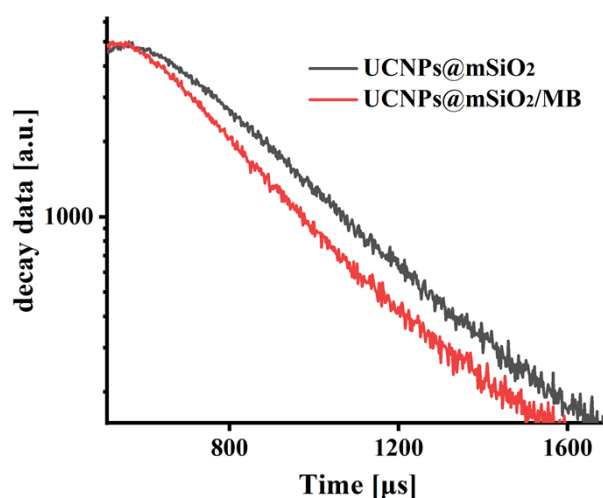

160  
161 Figure S4: Fluorescence lifetime curves of the prepared UCNPs@mSiO<sub>2</sub> (black line) and  
162 UCNPs@mSiO<sub>2</sub>/MB (red line). The lifetime was measured in the emission channel of 659 nm excited by  
163 980 nm laser.

164 Electron spin resonance analysis was used to directly detect the generated ROSs. Here, we  
165 chose 2,2,6,6-tetramethyl-4-piperidone (4-oxo-TEMP) as a spin trap to detect <sup>1</sup>O<sub>2</sub>.<sup>6</sup> As shown  
166 in Figure S5, the ESR signals of the prepared UCNPs@mSiO<sub>2</sub>/MB under the excitation  
167 exhibited an obvious 1:1:1 triplet spectrum, which was the characteristic spectrum of the adduct  
168 formed between 4-oxo-TEMP and <sup>1</sup>O<sub>2</sub> while no ESR signals were observed for  
169 UCNPs@mSiO<sub>2</sub>/MB without the excitation owing to the absence of LRET between UCNPs  
170 and MB molecules.

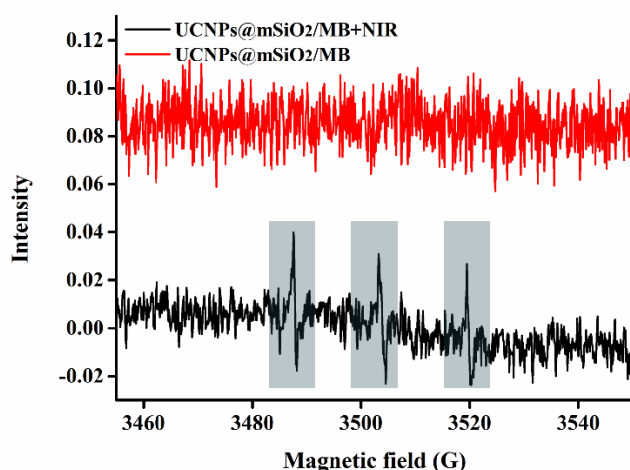

171  
 172 Figure S5: ESR spectra of 4-oxo-TEMP/<sup>1</sup>O<sub>2</sub> for the prepared UCNP@mSiO<sub>2</sub> with and without the excitation  
 173 of 980 nm laser.

### 174 3.4 Preparation of UCNP@mSiO<sub>2</sub>/MB@PAH

175 The obtained upconversion photodynamic nanotheranostic agent, UCNP@mSiO<sub>2</sub>/MB (2.0  
 176 mg), was dispersed in 2.0 mL of PAH aqueous solution (0.6 mg/mL). After being stirred for  
 177 6.0 h, the obtained UCNP@mSiO<sub>2</sub>/MB@PAH was centrifugated, washed with ultrapure water  
 178 for three time and dispersed in ultrapure water for further use.

179 As shown in Figure S6a, the modification of PAH would largely increase the ζ-potential  
 180 of the nanoprobe from -14.9 mV to 45.4 mV owing to the protonation effect of the surface -  
 181 NH<sub>2</sub> group, which was beneficial to deliver nucleic acids. As expected, PAH polymer formed  
 182 a uniform protection layer on the surface of UCNP@mSiO<sub>2</sub>/MB as shown in Figure S6b.

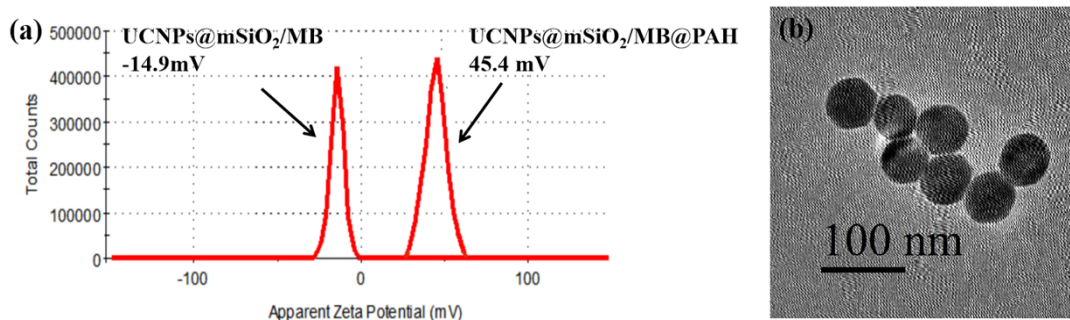

183  
 184 Figure S6: (a) ζ-potential analysis of UCNP@mSiO<sub>2</sub>/MB and UCNP@mSiO<sub>2</sub>/MB@PAH; (b) TEM image  
 185 of UCNP@mSiO<sub>2</sub>/MB@PAH.

### 186 3.5 DNA sequence

187 **Table S1: Special sequence of used DNA**

|       | Sequence (5'-3')               |
|-------|--------------------------------|
| DNA 1 | gaa tcg att a/SH-SH/cac cca gg |

Non-modified DNA 1 gaa tcg att acc ccc agg  
 DNA 2 tcg att **ccc tgg ggg agt att gcg gag gaa ggt** ggc tat agc aca tgg gt  
 (ATP aptamer was bold labeled and underlined)  
 DNA 3 acc ttc ct/SH-SH/ ttt acc cat gtg cta tag cc  
 Non-modified DNA 3 acc ttc ctt tta ccc atg tgc tat agc c  
 DNA 4 tcg att **ccc tgg ggg agt att gcg gag gaa ggt** ggc tat agc aca tgg gtg  
 cag ttg atc ctt tgg ata ccc tgg (ATP aptamer was bold labeled and  
 underlined, MUC1 aptamer was labeled in emerald green)

---

### 188 3.6 Construction of DOX molecules loaded DNA duplex

189 Firstly, the DNA hybrids include the hybrid (1)/(2), the hybrid DNA (2)/(3) and the hybrid  
 190 DNA (1)/(4) were obtained through the annealing procedure which were verified by the PAGE  
 191 gel analysis.

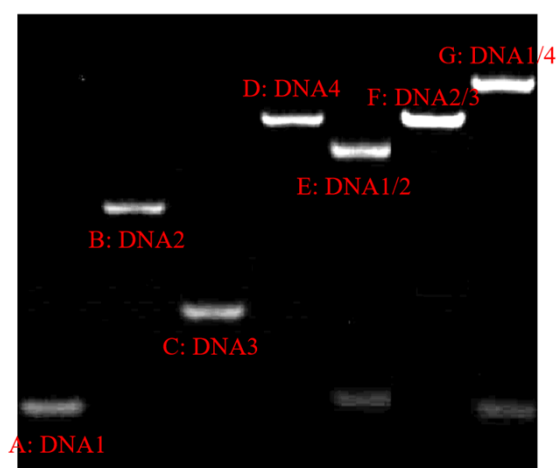

192  
 193 Figure S7: PAGE gel analysis of the used DNA strands in this experiment. The concentrations of DNA  
 194 strands were 1.0  $\mu\text{M}$ . The hybridized DNA strands include DNA hybrid (1)/(2), DNA hybrid (2)/(3) and  
 195 DNA hybrid (1)/(4) were achieved in TE buffer (pH-8.0 containing 10 mM  $\text{Mg}^{2+}$ ) by the annealing process.

196 It was reported that the fluorescence intensity of DOX molecules would be sequentially  
 197 decreased due to the intermolecular forster resonance energy transfer when intercalated into  
 198 DNA duplex. Besides, the decrease degree showed a good correlation with the molar ratio of  
 199 DNA duplex. As shown in Figure S8, both of the optimum molar ratio of DNA hybrid (1)/(2)  
 200 to DOX molecules and DNA hybrid (2)/(3) to DOX molecules was calculated to be 0.3:1. Thus,  
 201 the corresponding DOX molecules was added into the DNA duplex and reacted for overnight  
 202 to obtain the dsDNA/DOX in this experiment. Briefly, two DNA double strands, the hybrid  
 203 (1)/(2) and the hybrid DNA (2)/(3), was obtained via the conventionally-used annealing  
 204 procedure. Then, 5.0 nmol of DOX molecules were added into 10  $\mu\text{M}$  of the DNA hybrid (1)/(2)



205 (150  $\mu\text{L}$ ) and DNA hybrid (2)/(3) (150  $\mu\text{L}$ ), respectively, and then incubated overnight to obtain  
 206 the DNA hybrid (1)/(2)/DOX and DNA hybrid (2)/(3)/DOX, respectively.

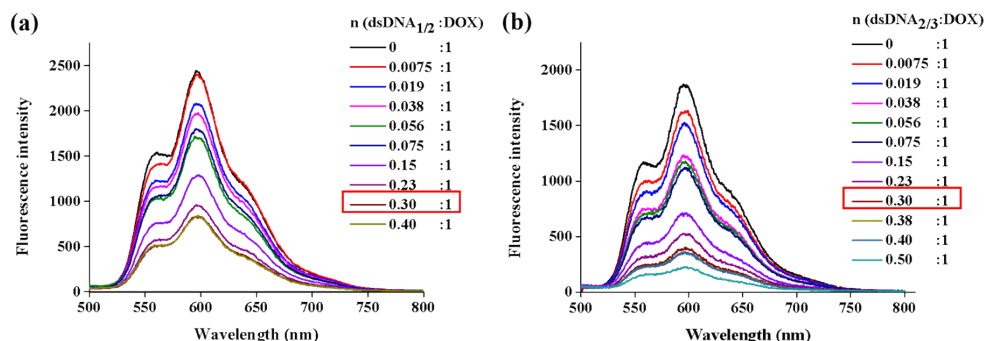

207

208 Figure S8: the fluorescence spectra of 5.3  $\mu\text{M}$  DOX in the HEPES buffer (20 mM, pH-7) with increasing  
 209 molar ratios of the DNA hybrid (1)/(2) (a) and the DNA hybrid (2)/(3) (b) after incubation for 6 h.

### 210 3.7 Scheme of the DNA nanoshell/DOX

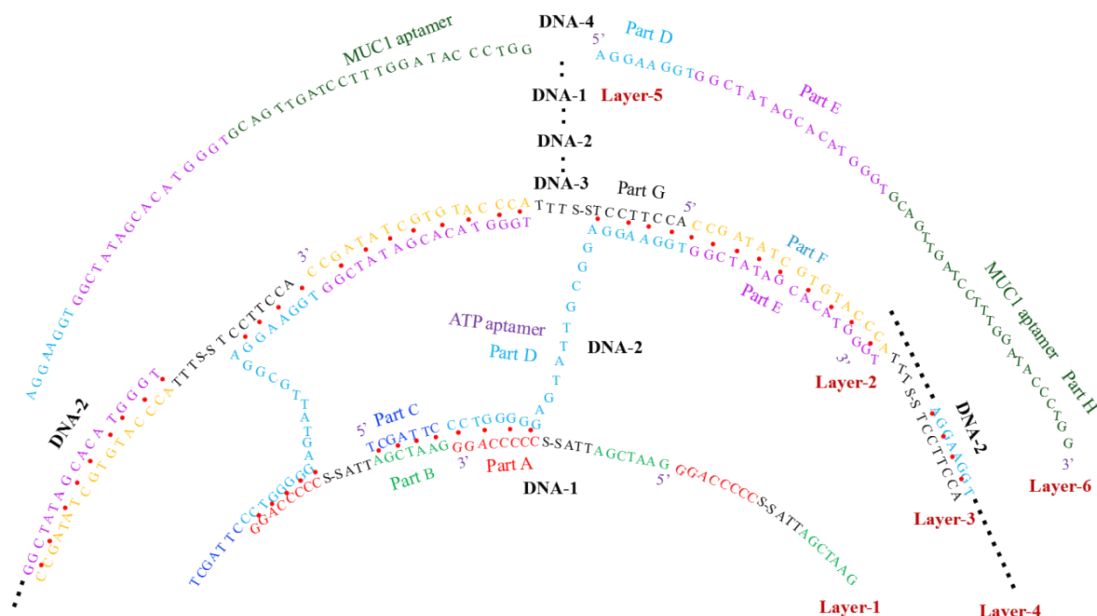

211

212 Figure S9: Scheme of the formed DNA nanoshell. The red dot represented for DOX molecules.

### 213 3.8 Design of the nanotheranostic agent UCNPs@mSiO<sub>2</sub>/MB@PAH@DNA 214 nanoshell/DOX

215 The final upconversion nanotheranostic agent, was obtained by the layer-by-layer self-assembly  
 216 method. Briefly, UCNPs@mSiO<sub>2</sub>/MB@PAH solution (2.0 mL, 1.0 mg/mL) was coated with  
 217 the designed DNA nanoshell by sequential incubation in DNA hybrid (1)/(2)/DOX (100  $\mu\text{L}$ , 10  
 218  $\mu\text{M}$ ) or DNA hybrid (2)/(3)/DOX (100  $\mu\text{L}$ , 10  $\mu\text{M}$ ) or DNA hybrid (1)/(4)/DOX (100  $\mu\text{L}$ , 10  
 219  $\mu\text{M}$ ) for 4 h. After each incubation, two washing steps were performed to remove the excess  
 220 non-adsorbed DNA. Guided by the above procedure, the final upconversion nanotheranostic  
 221 agent, UCNPs@mSiO<sub>2</sub>/MB@PAH@DNA nanoshell/DOX, with concentration of 2.5 mg/mL

222 were obtained with six layers of DNA coating.

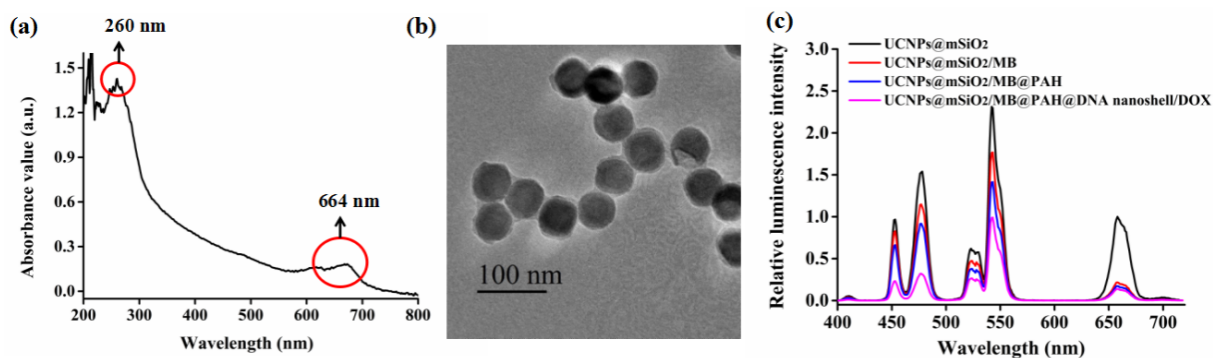

223

224 Figure S10: (a) Uv-Vis spectra of the prepared UCNPs@mSiO<sub>2</sub>/MB@PAH@DNA nanoshell/DOX; (b)  
 225 TEM spectra of the prepared UCNPs@mSiO<sub>2</sub>/MB@PAH@DNA nanoshell/DOX; (c) relative luminescence  
 226 spectra of UCNPs@mSiO<sub>2</sub>, UCNPs@mSiO<sub>2</sub>/MB, UCNPs@mSiO<sub>2</sub>/MB@PAH and  
 227 UCNPs@mSiO<sub>2</sub>/MB@PAH@DNA nanoshell/DOX.

### 228 3.9 Stability and hemocompatibility of the prepared nanomaterials

229 To validate the stability of the prepared nanomaterials, we compared the change in their  
 230 dispersibility, relative fluorescence intensity and Uv-Vis absorbance spectra within one week.  
 231 As shown in Figure S11, the prepared nanoprobcs still kept well dispersibility after one week.  
 232 Besides, there was no obvious change in their luminescence intensity and Uv-Vis spectra.

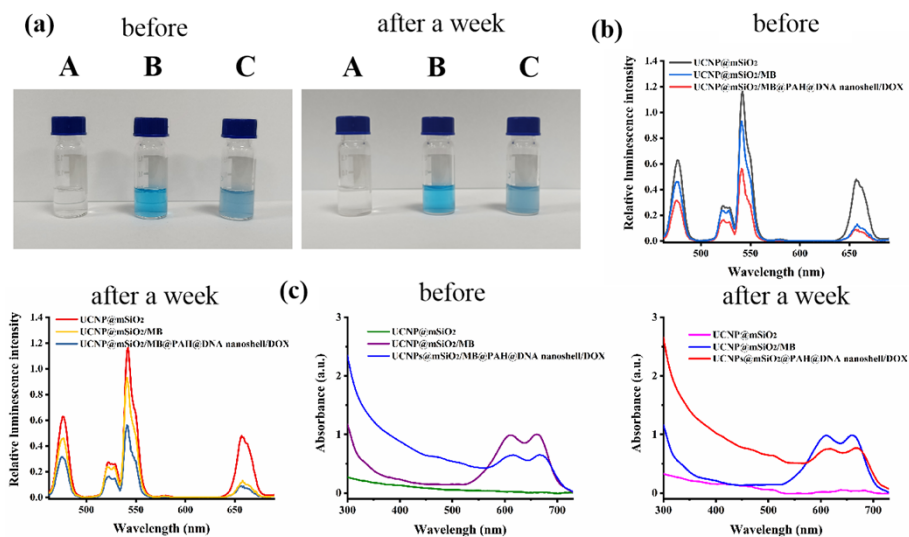

233

234 Figure S11: (a) Graphs of the prepared nanomaterials, A-C represented for the prepared UCNPs@mSiO<sub>2</sub>,  
 235 UCNPs@mSiO<sub>2</sub>/MB and UCNPs@mSiO<sub>2</sub>/MB@PAH@DNA nanoshell/DOX, respectively; (b) Relative  
 236 luminescence spectra of the nanomaterials which were newly prepared and kept for one week ; (c) Uv-Vis  
 237 spectra of the nanomaterials which were newly prepared and kept for one week.

238 Furthermore, the hemocompatibility of the prepared nanomaterials was evaluated  
 239 according to the references.<sup>7</sup> Briefly, red blood cells (RBCs) in 2 ml of fresh newborn bovine  
 240 blood sample were separated by centrifugation at 2000 rpm for 5 min, washed three times with

241 physiological saline, then resuspended in saline solution. The diluted RBCs suspension was  
 242 incubated with the prepared nanoprobes (0.1 mg/mL) and then kept at 37°C for 2 h to induce  
 243 hemolysis. Finally, the mixture was centrifuged at 2000 rpm for 5 min, and 100  $\mu$ L of the  
 244 obtained supernatant was transferred to a 96-well plate where its absorbance values at 490 nm  
 245 were detected using a microplate reader. Diluted RBCs suspension (0.2 mL) incubated with  
 246 physiological saline (0.8 mL) and water (0.8 mL) was used as a negative or positive control,  
 247 respectively. The hemolysis percent of RBCs was calculated using the following formula:  
 248 hemolysis (%) = (sample absorbance-negative control absorbance) / (positive control  
 249 absorbance-negative control absorbance) $\times$ 100. Each experiment contained six parallel groups.  
 250 As shown in Figure S12, 0.1 mg/mL of the prepared nanomaterials displayed less than  
 251 12.3% of hemolytic activity. Thus, the designed nanotheranostic agent owned good  
 252 hemocompatibility, which offered great potential for their *in vivo* biomedical applications  
 253 involving intravenous administration and transport.

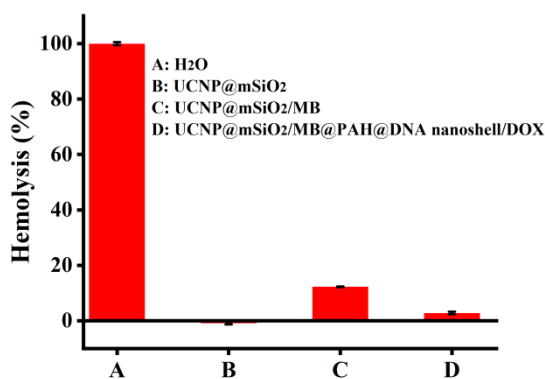

254

255 Figure S12: Percentage of hemolysis of red blood cells incubated with 0.1 mg/ml of A) H<sub>2</sub>O, B)  
 256 UCNPs@mSiO<sub>2</sub>, C) UCNPs@mSiO<sub>2</sub>/MB, D) UCNPs@mSiO<sub>2</sub>/MB@PAH@DNA nanoshell/DOX.

### 257 3.10 Fluorescence calibration curve of DOX molecules

258 In order to quantify released DOX molecules, a series of DOX aqueous solution in the  
 259 concentration range of 0.0001-0.002 mg/mL was analyzed by the fluorescence spectrometry.  
 260 As shown in Figure S13, the obtained fluorescence calibration curve was  $y=989834.56x+111.91$   
 261 with correlation coefficient  $R^2=9984$ .

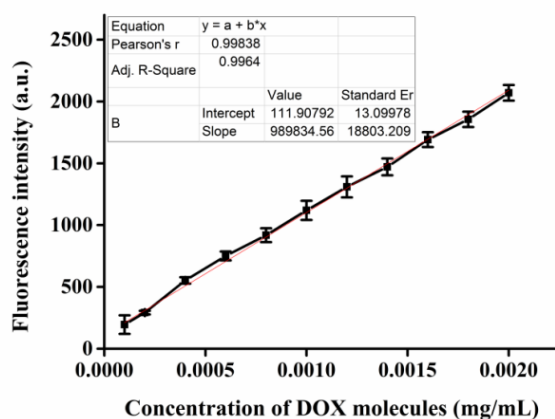

262

263

Figure S13: The fluorescence calibration curve of DOX molecule.

## 264 4. In vitro performance evaluation of the prepared nanotheranostic agent

### 265 4.1 ATP and GSH induced the release of loaded DOX molecules

266 The solution of the prepared nanotheranostic agent (100  $\mu$ L, 2.5 mg/mL) were mixed with GSH  
 267 or ATP in different concentration range. After reacting for certain time, the mixture solution  
 268 was centrifugated and the supernatants was analyzed with the fluorescence spectrophotometer  
 269 to record the fluorescence information of DOX molecules and calculate their release ratio.

270 Based on the fluorescence intensity of DOX in supernatants and the obtained calibration  
 271 curve, the amount of released DOX could be obtained for evaluating the release efficiency of  
 272 the designed nanotheranostic agent. As shown in Figure S14a, the released amount of DOX  
 273 molecules improved with the concentration of GSH increasing from 0.3 mM to 10 mM, and the  
 274 released ratio could reach to 36.3-63.2% when triggered by GSH with concentration of 2-10  
 275 mM. Contrarily, DOX molecules showed negligible release when triggered by GSH with its  
 276 extracellular concentration of 2-50  $\mu$ M. Considering the strong binding of ATP aptamer to ATP,  
 277 the formed DNA nanoshell would be broken and then release free DOX molecules. As proved  
 278 by Figure S14b, the released amount of DOX molecules improved in the concentration range  
 279 of ATP from 0-15 mM and the highest release efficiency could reach to 40.80% at 15 mM of  
 280 ATP. Then, we considered the cooperative release ability of the prepared nanotheranostic agent.  
 281 As demonstrated in Figure S14c, the designed nanotheranostic agent showed increased release  
 282 amount and the highest release efficiency could reach to 77.5% at 10 mM GSH and ATP.  
 283 Subsequently, we studied the release kinetics of the prepared nanotheranostic agent. As shown  
 284 in Figure S14d, the prepared nanotheranostic agent showed a boom-like release when triggered  
 285 by GSH which could be nearly finished after 5 min. Besides, the release could reach to  
 286 equilibrium at 30 min when triggered by ATP (Figure S14e). The release speed could be further  
 287 accelerated due to the cooperative function of ATP and GSH (Figure S14f).

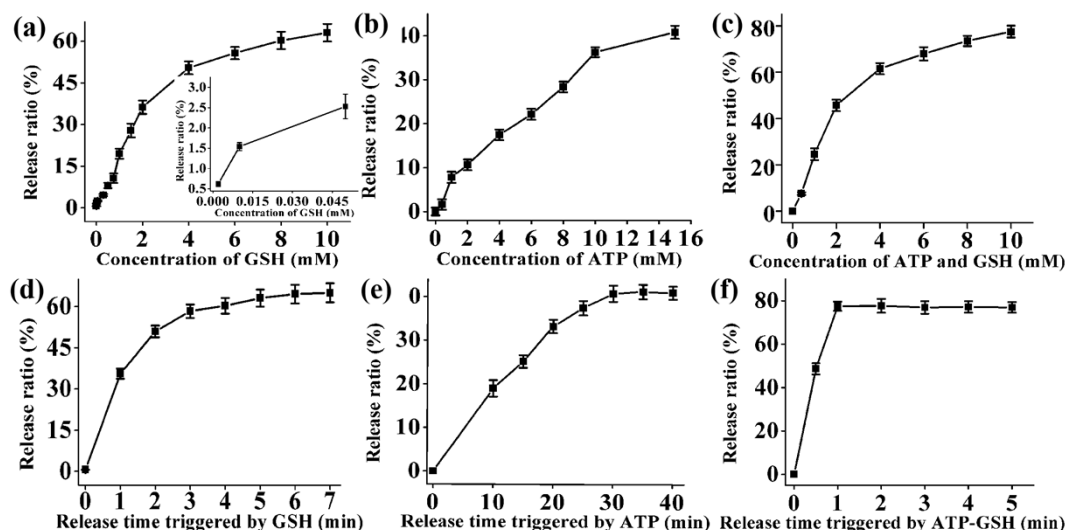

288

289 Figure S14: Release ratio of DOX molecules when the prepared nanotheranostic agent was triggered by (a)  
 290 GSH; (b) ATP; (c) ATP and GSH; release kinetics of DOX molecules when the prepared nanotheranostic  
 291 agent was triggered by (d) 10 mM of GSH; (e) 10 mM of ATP; (f) 10 mM of ATP and GSH.

292 When the molar ratio of DNA hybrid (1)/(2)/DOX to DNA hybrid (2)/(3)/DOX was set 2:1,  
 293 2:2 and 3:2, respectively, thus around six, eight and ten DNA layers formed the DNA nanoshell.  
 294 As shown in Figure S15a, the release ratio of DOX molecules decreased with the increase in  
 295 the number of DNA layers since the over dense of DNA nanoshell was unfavorable for the  
 296 release of loaded drug molecules. Beside the number of DNA layers, the rational design of  
 297 DNA strand could also achieve the controlled release of loaded drugs. A decrease in the release  
 298 ratio of DOX molecules and an increase in the equilibrium time were observed for the  
 299 nanotheranostic agent made of DNA strand without the modification of disulfide bond (Figure  
 300 S15b-S15c).

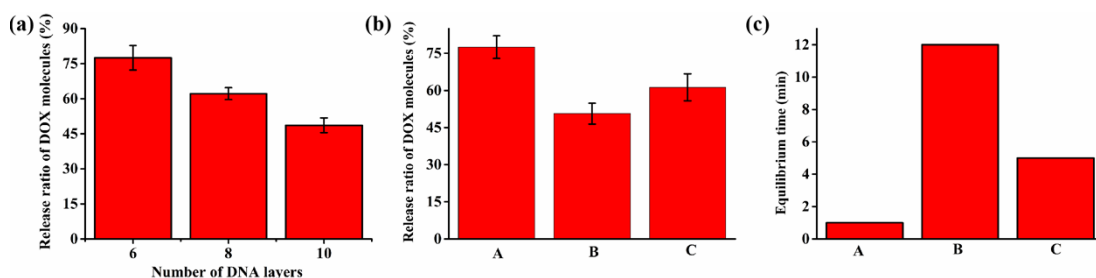

301 Figure S15: (a) Effects of the number of DNA layers on the release ratio of DOX molecules; (b) Effects of  
 302 the DNA structure on the release ratio of DOX molecules; (c) Effects of the DNA structure on the equilibrium  
 303 time of the released DOX molecules. A represented for the nanotheranostic agent prepared by DNA-1 with  
 304 disulfide bond and DNA-3 with disulfide bond; B represented for the nanotheranostic agent prepared by non-  
 305 modified DNA-1 and DNA-3; C represented for the nanotheranostic agent prepared by DNA-1 and non-  
 306 modified DNA-3. The formed nanotheranostic agent was triggered by 10 mM of ATP and GSH for 5 min.

## 307 4.2 Detection of the produced ROSs in aqueous solution

308 1,3-diphenylisobenzofuran (DPBF) could irreversibly react with ROSs to cause the  
309 corresponding decrease in its Uv-Vis absorbance intensity at 410 nm.<sup>8</sup> Thus, DPBF was used  
310 to evaluate the generated amount of ROSs induced by the prepared nanotheranostic agent.  
311 Briefly, 1.0 mg/mL of the prepared nanotheranostic agent was mixed with 0.02 mg/mL DPBF,  
312 irradiated with 980 nm continuous-wave laser for 40 min with an interval of 5 min, and then  
313 recorded its Uv-Vis absorbance information at 410 nm. As shown in Figure S16a, the prepared  
314 nanotheranostic agent induced a negligible decrease in the Uv-Vis absorbance intensity of  
315 DPBF due to the little produced ROSs, proving the protection function of the surface DNA  
316 nanoshell could prevent the inner PSs from reacting with oxygen to produce ROSs. Once the  
317 prepared nanotheranostic agent was triggered by ATP and GSH, the outer DNA nanoshell was  
318 broken, making the loaded PSs active and then producing ROSs under the excitation of NIR  
319 laser (Figure S16b-S16d). Besides, their ability to produce ROSs was comparable to those of  
320 the previously prepared UCNPs@mSiO<sub>2</sub>/MB and UCNPs@mSiO<sub>2</sub>/MB@PAH nanoprobe  
321 (Figure S17). In this experiment, the formed DNA nanoshell could not only achieve the  
322 activatable chemotherapy with fast response to TME, but also be used to design the controllable  
323 and pre-protective PDT.

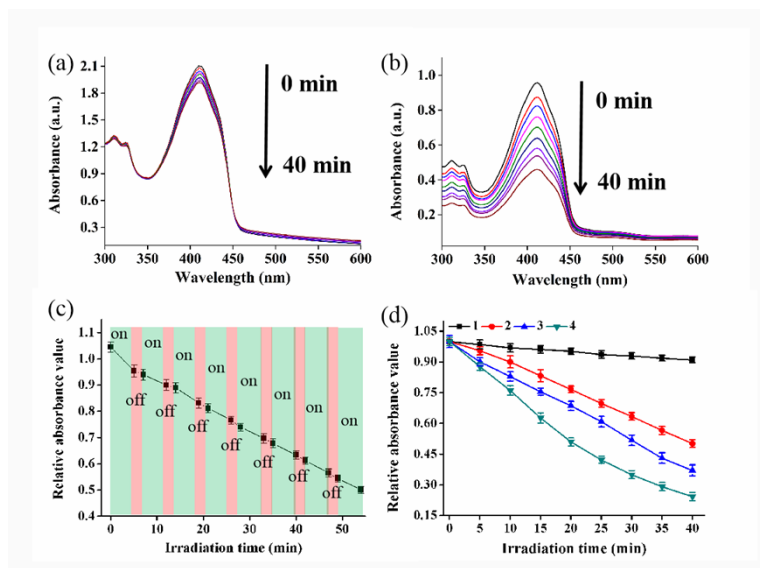

324

325 Figure S16: Absorbance value of DPBF when mixed with the prepared nanotheranostic agent and irradiated  
326 under 980 nm laser (1.5 W/cm<sup>2</sup>) (a) before the stimulus of ATP and GSH (labeled as probe 1); (b) after the  
327 stimulus of ATP and GSH (labeled as probe 2); (c) On-off examination of ROSs production for the prepared  
328 nanotheranostic agent under the irradiation of 980 nm laser; (d) the relative absorbance value of DPBF when  
329 mixed with different nanoprobe and irradiated under 980 nm laser. The prepared UCNPs@mSiO<sub>2</sub>/MB@PAH  
330 was labeled as probe 3 and the prepared UCNPs@mSiO<sub>2</sub>/MB was labeled as probe 4.



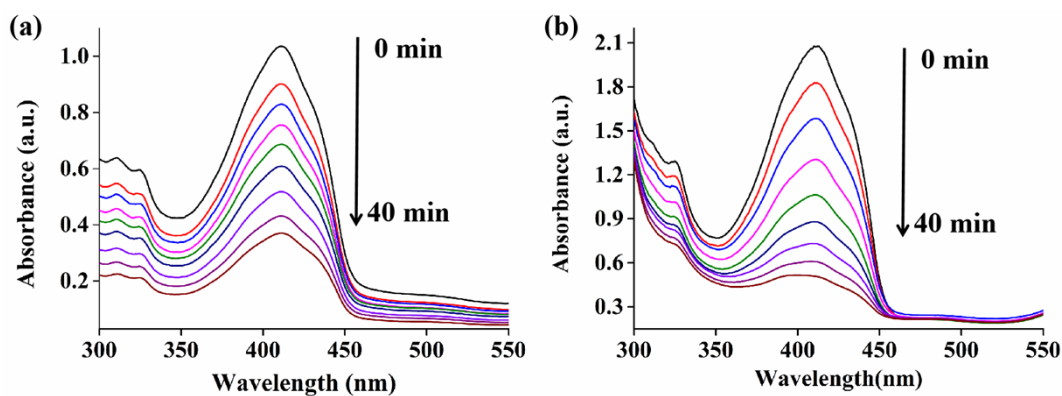

331

332 Figure S17: Absorbance value of DPBF when mixed with 1.0 mg/mL of the prepared (a)  
 333 UCNPs@mSiO<sub>2</sub>/MB@PAH or (b) UCNPs@mSiO<sub>2</sub>/MB and then irradiated under 980 nm laser for 40 min  
 334 with an interval of 5 min.

## 335 5. Cell experiment

### 336 5.1 Cell culture

337 The cell culture solution for A549 cancer cells chose Dulbecco's modified Eagle's medium  
 338 (DMEM) including 10% heat-inactivated fetal bovine serum (FBS), penicillin (100 U/mL), and  
 339 streptomycin (100 U/mL) and the cell culture environment was set at 37°C, humidified air and  
 340 5% CO<sub>2</sub>.

### 341 5.2 Stability and biocompatibility of the prepared nanotheranostic agent

342 The stability of the prepared nanotheranostic agent, UCNPs@mSiO<sub>2</sub>/MB@PAH@DNA  
 343 nanoshell/DOX was investigated by examining the DOX leakage when incubated in 10% fetal  
 344 bovine serum buffer. After certain time, the release percentage of DOX molecules in the 10%  
 345 fetal bovine serum buffer was detected and calculated according to the standardization curve of  
 346 fluorescence intensity. As shown in Figure S18a, the release percentage of DOX molecules in  
 347 the 10% fetal bovine serum buffer was less than 8.0% within 24 h.

348 The cell cytotoxicity of the corresponding nanotheranostic agent,  
 349 UCNPs@mSiO<sub>2</sub>@PAH@DNA nanoshell was evaluated according to the CCK-8 assay.  
 350 Briefly, A549 cancer cells were firstly incubated in the 96-well flat-bottom microtiter plates for  
 351 12 h and then incubated with different concentrations of the prepared nanoprobe for 12 h, 24 h  
 352 and 36 h, respectively. Each concentration was examined in four parallel wells. After different  
 353 treatments, A549 cancer cells were stained with 10 μL of CCK-8 agent and then detected their  
 354 absorbance at 450 nm with the microplate reader after 1 h. The cell viability was calculated  
 355 according to the followed equation: Cell viability (%)=(Mean Absorbance<sub>treated wells</sub> - Mean  
 356 Absorbance<sub>blank wells</sub>)/(Mean Absorbance<sub>control wells</sub> - Mean Absorbance<sub>blank wells</sub>) × 100. To study  
 357 the effects of laser irradiation time on the cell viability, A549 cancer cells cultured in the 96-

358 well flat-bottom microtiter were incubated with 80  $\mu\text{g}/\text{mL}$  of the prepared nanoprobe for 12 h  
 359 and then irradiated with the 980 nm continuous-wave laser for different time. After incubated  
 360 in the cell incubator for another 12 h, the treated A549 cancer cells was stained with 10  $\mu\text{L}$  of  
 361 CCK-8 agent for 1 h and then detected their absorbance at 450 nm to calculate the cell viability.  
 362 As shown in Figure S18b, there was negligible cell death induced by the used irradiation  
 363 intensity even at the irradiation time of 32 min, meanwhile the prepared nanotheranostic agent  
 364 would not induce obvious cell cytotoxicity in the concentration range of 0.08-0.14 mg/mL  
 365 within 36 h (Figure S18c).

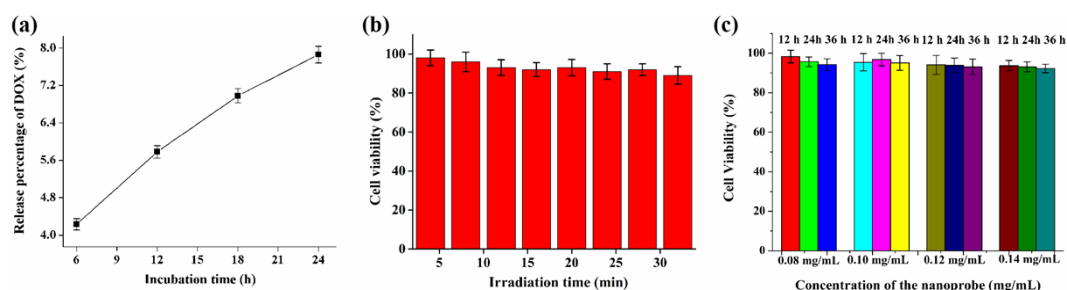

366

367 Figure S18: (a) release percentage of DOX molecules when the prepared nanotheranostic agent mixed in the  
 368 10% fetal bovine serum buffer within 24 h; (b) cell viability when treated with the control nanoprobe  
 369 UCNPs@mSiO<sub>2</sub>@PAH@DNA nanoshell and then irradiated with 980 nm laser with power density of 1.5  
 370 w/cm<sup>2</sup> for different time; (c) cell viability of A549 cancer cells when treated with different concentrations of  
 371 the prepared UCNPs@mSiO<sub>2</sub>@PAH@DNA nanoshell within 36 h.

### 372 5.3 Cellular uptake and localization of the prepared nanotheranostic agent

373 The prepared nanotheranostic agent (80  $\mu\text{g}/\text{mL}$ ) was added into A549 cancer cells or L132  
 374 normal cells cultured in clean glass coverslips for 2 h, 5 h and 8 h, respectively. After washed  
 375 with sterile PBS buffer to remove excess probes, cells was stained with the commercial  
 376 fluorescence dye, Lyso-tracker Red for another 30 min. After washed with cold PBS buffer for  
 377 several times, the treated cells were observed with the two-photon laser confocal scanning  
 378 microscope. The fluorescence information of the designed nanoprobe was recorded in the green  
 379 channel with wavelength range of 500-570 nm under the excitation of 980 nm laser meanwhile  
 380 the florescence information of the cellular lysosome was recorded in the red channel with the  
 381 wavelength range of 575-635 nm under the excitation of 561 nm.

382 To validate its targetability, the uptake of the designed nanotheranostic agent into A549  
 383 cancer cells and L132 normal cells was further studied. As shown in Figure S19, there was  
 384 obvious decreased in the uptake of the prepared nanotheranostic agent into the normal cells  
 385 versus that of cancer cells owing to the targetability of MUC1 aptamer.



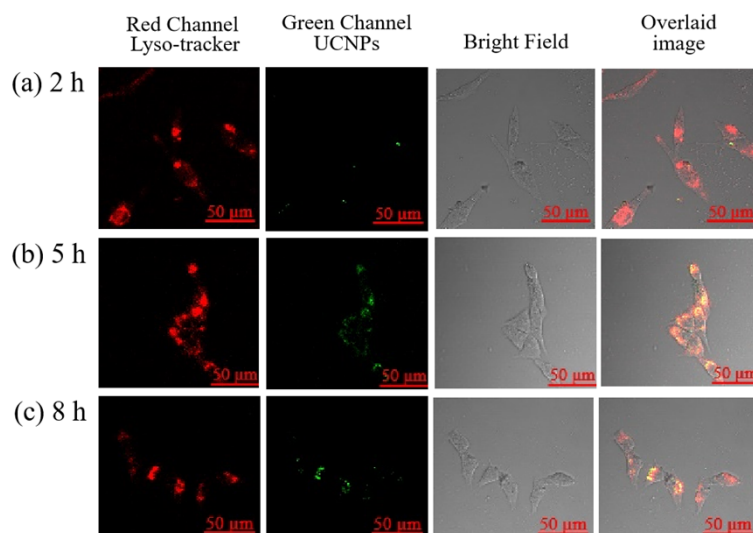

386

387 Figure S19: Confocal laser scanning microscopy (CLSM) images of L132 normal cells treated with 80  $\mu\text{g/mL}$   
 388 of the prepared nanotheranostic agent for (a) 2 h , (b) 5 h and (c) 8 h. Red channel was used to record the  
 389 lysosome fluorescence meanwhile green channel was used to record the fluorescence information of the  
 390 designed nanotheranostic agent.

391 Besides, the cell uptake and targetability of the nanocarriers without the outer DNA, that  
 392 is UCNPs@mSiO<sub>2</sub>/MB@PAH nanoprobe, were investigated. As demonstrated in Figure S20,  
 393 the designed UCNPs@mSiO<sub>2</sub>/MB@PAH nanoprobe could be endocytosed into L132 normal  
 394 cells and A549 cancer cells without significant difference in the cell uptake owing to the  
 395 absence of the surface MUC1 aptamer.

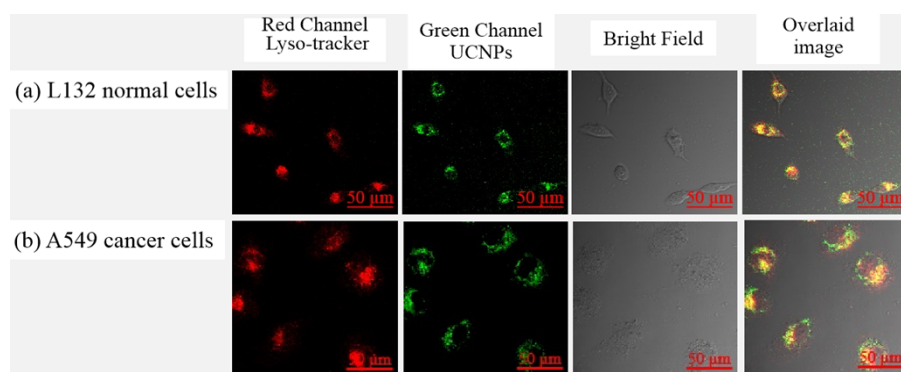

396

397 Figure S20: Confocal laser scanning microscopy (CLSM) images of L132 normal cells and A549 cancer cells  
 398 treated with 80  $\mu\text{g/mL}$  of the UCNPs@mSiO<sub>2</sub>/MB@PAH nanoprobe for 8 h. The lysosome fluorescence  
 399 information was recorded in the red channel with the wavelength range of 575-635 nm under the excitation  
 400 of 561 nm and the fluorescence information of the designed nanotheranostic agent was recorded in the green  
 401 channel with wavelength range of 500-570 nm under the excitation of 980 nm laser.

#### 402 5.4 Intracellular DOX release

403 A549 cancer cells cultured in the glass coverslips was incubated with the prepared  
 404 nanotheranostic agent (80  $\mu\text{g/mL}$ ) for different time. After removed the excess probes, A549  
 405 cancer cells was stained with LysoTracker Red and Hoechst 33342, and then observed the

406 lysosome and nucleus under the laser confocal scanning microscope. The fluorescence  
407 information of DOX molecules, lysosome and nucleus was as followed. Blue channel was  
408 collected at 410-460 nm under the excitation of 405 nm to obtain the fluorescence information  
409 of nucleus; Green channel was collected at 525-620 nm under the excitation of 488 nm to obtain  
410 the fluorescence information of DOX molecules; Red channel was collected at 575-635 nm  
411 under the excitation of 561 nm to obtain the fluorescence information of lysosome.

412 For cytometry, A549 cancer cells were incubated with 80  $\mu\text{g}/\text{mL}$  of the prepared  
413 nanomaterials for 12 h and then washed with PBS buffer to remove the excess nanoprobe. After  
414 that, the treated A549 cancer cells were collected with the trypsin digestion, washed with PBS  
415 for twice and injected into flow cytometry to collect the average fluorescence information of  
416 released DOX molecules. As shown in Figure S21, A549 cancer cells displayed negligible DOX  
417 fluorescence when treated with the control nanoprobe while there was obvious DOX  
418 fluorescence due to the triggered release when treated with the prepared  
419 UCNPs@mSiO<sub>2</sub>/MB@PAH@DNA nanoshell/DOX.

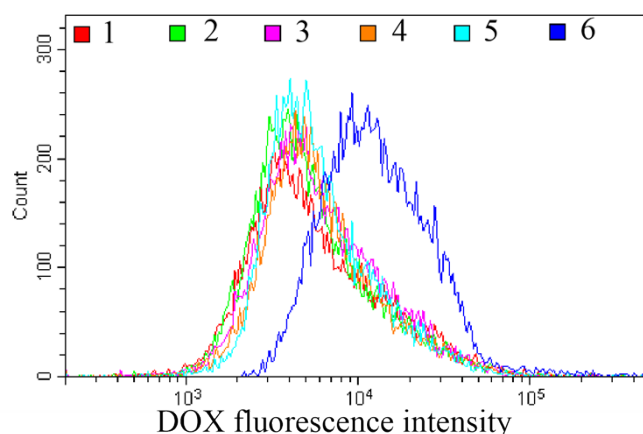

420

421 Figure S21: Cytometry analysis of DOX fluorescence intensity of A549 cancer cells with different treatments.  
422 1: without any treatment; 2: irradiated with NIR laser; 3: incubated with 80  $\mu\text{g}/\text{mL}$  of the prepared  
423 UCNPs@mSiO<sub>2</sub>@PAH@DNA nanoshell for 12 h; 4: incubated with 80  $\mu\text{g}/\text{mL}$  of the prepared  
424 UCNPs@mSiO<sub>2</sub>@MB nanoprobe for 12 h and then irradiated with NIR laser; 5: incubated with 80  $\mu\text{g}/\text{mL}$   
425 of the prepared UCNPs@mSiO<sub>2</sub>@MB@PAH@DNA nanoshell for 12 h; 6: incubated with 80  $\mu\text{g}/\text{mL}$  of the  
426 prepared UCNPs@mSiO<sub>2</sub>@MB@PAH@DNA nanoshell/DOX for 12 h.

### 427 5.5 In vitro ROSs generation

428 The *in vitro* ROSs generation was analyzed with the cellular ROSs indicator, 2',7'-  
429 dichlorofluorescein diacetate (DCFH-DA) by the laser confocal scanning microscope and the  
430 flow cytometry. To *in-situ* observe the production of cellular ROSs, A549 cancer cells were  
431 firstly incubated with/without 10  $\mu\text{M}$  oligomycin or 5 mM Ca<sup>2+</sup> or 500  $\mu\text{M}$  LPA for 30 min,  
432 and then incubated with the designed nanotheranostic agent for 12 h, washed with the sterilized

433 PBS buffer to remove the excess nanomaterials, and irradiated under the 980 nm continuous-  
434 wave laser ( $1.5 \text{ w/cm}^2$ , 4 min). Then, the treated A549 cancer cells was stained with diluted  
435 DCFH-DA staining solution for 30 min, washed with sterilized PBS buffer for several times  
436 and then observed the fluorescence information under the laser scanning confocal microscope.  
437 It was reported that DCFH-DA was firstly esterized by relative esterase and then oxidized into  
438 DCF by cellular ROSs which showed bright green fluorescence in the emission wavelength  
439 from 500 nm to 570 nm under the excitation at 488 nm.

440 Subsequently, the average fluorescence information of DCF in A549 cancer cells was  
441 analyzed with the flow cytometry. A549 cancer cells were incubated with the prepared  
442 nanomaterials and washed with PBS buffer. Then, the treated A549 cancer cells were collected  
443 with the trypsin digestion and divided into two parallel subgroups. One group was used as the  
444 irradiation group which was irradiated under 980 nm continuous-wave laser while the other  
445 group was used as the control group without irradiation. After treatment, both of the two parallel  
446 subgroups were resuspended in the diluted DCFH-DA solution for 30 min. Finally, the cell was  
447 washed with PBS for twice and injected into the flow cytometry to obtain their fluorescence  
448 information.

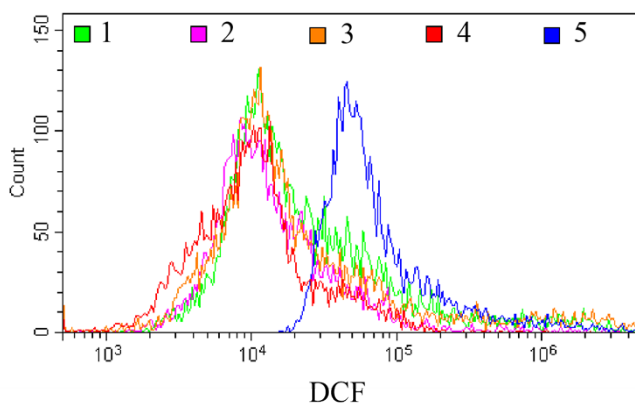

449  
450 Figure S22: Cytometry analysis of DCF fluorescence intensity of A549 cancer cells when treated with  
451 different nanoprob. 1: A549 cancer cells without any treatment; 2: A549 cancer cells irradiated with NIR  
452 laser; 3: A549 cancer cells incubated with  $80 \mu\text{g/mL}$  of the prepared UCNPs@mSiO<sub>2</sub>@PAH for 12 h; 4:  
453 A549 cancer cells incubated with  $80 \mu\text{g/mL}$  of the prepared UCNPs@mSiO<sub>2</sub>@PAH@DNA nanoshell for 12  
454 h and then irradiated with NIR; 5: A549 cancer cells incubated with  $80 \mu\text{g/mL}$  of the prepared  
455 UCNPs@mSiO<sub>2</sub>@MB@PAH@DNA nanoshell/DOX for 12 h and then irradiated with NIR.

## 456 5.6 Cell apoptosis assay in living cells

457 In this experiment, the cell apoptosis ratio induced by the prepared nanotheranostic agent was  
458 evaluated with the commercial apoptosis detection kit by the flow cytometry. Briefly, A549  
459 cancer cells were treated as the above procedure in section 5.5 including incubated with the

460 prepared nanotheranostic agent or the control nanomaterials, collected with the trypsin  
 461 digestion and irradiated under 980 nm continuous-wave laser. Then, A549 cancer cells were  
 462 uniformly dispersed in 1.0 mL of apoptosis staining solution consisting of 195  $\mu$ L binding  
 463 buffer, 5  $\mu$ L Annexin V-APC staining solution and 10  $\mu$ L 7-AAD staining solution. After 10  
 464 min, the stained A549 cancer cells were washed with PBS for several times and then  
 465 resuspended in PBS for the following flow cytometry analysis. To be mentioned, the necessary  
 466 fluorescence compensation must be operated according to the manufacturer's instructions.

467 As shown in the scatter grams (Figure S23), the negative control group including cell without  
 468 any treatment, cell with only laser irradiation, cell treated with the corresponding nanoprobe  
 469 UCNPs@mSiO<sub>2</sub>/PAH@DNA nanoshell, displayed the high cell viability and low cell apoptosis  
 470 ratio. After treated with the photodynamic nanotheranostic agent,  
 471 UCNPs@mSiO<sub>2</sub>/MB@PAH@DNA nanoshell, A549 cancer cells shifted from the high  
 472 viability to 20.66% of early apoptosis and 26.15% of late apoptosis while A549 cancer cells  
 473 treated with the chemotherapy carrier, UCNPs@mSiO<sub>2</sub>@PAH@DNA nanoshell/DOX, around  
 474 20.10% of early apoptosis and 26.86% of late apoptosis would be induced. As compared, after  
 475 incubated with the finally designed nanotheranostic agent UCNPs@mSiO<sub>2</sub>/MB@PAH@DNA  
 476 nanoshell/DOX and then irradiated with the laser, A549 cancer cells would be induced around  
 477 7.80% of early apoptosis and 54.17% of late apoptosis. Thus, the apoptosis was a major cell  
 478 death modality in A549 cancer cells when treated with the designed nanotheranostic agent in  
 479 this experiment.

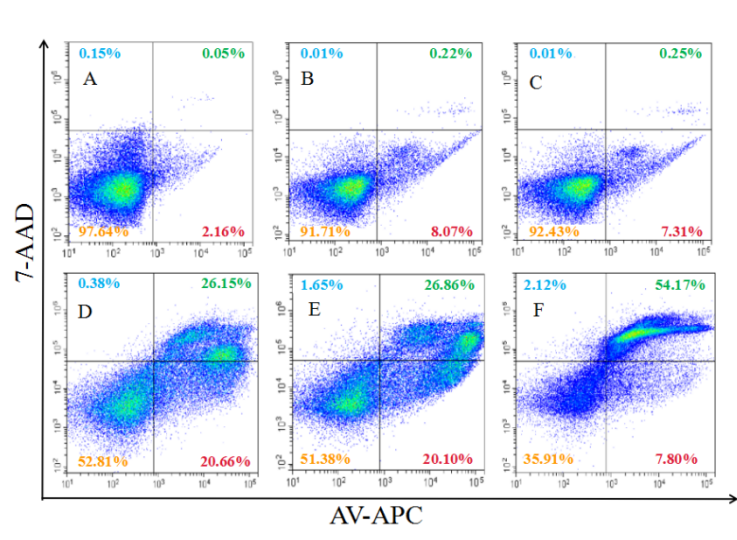

480

481 Figure S23: Apoptosis of MCF-7 cancer cells (A) without treatment (B) only irradiated with 980 nm laser  
 482 (1.5 W/cm<sup>2</sup>, 4 min); (C) only incubated with the prepared UCNPs@mSiO<sub>2</sub>@PAH@DNA nanoshell for 12  
 483 h; (D) incubated with the prepared UCNPs@mSiO<sub>2</sub>/MB@PAH for 12 h and then irradiated with 980 nm  
 484 laser; (E) incubated with the prepared UCNPs@mSiO<sub>2</sub>@PAH@DNA nanoshell/DOX for 12 h; (F) incubated

485 with the prepared UCNPs@mSiO<sub>2</sub>/MB@PAH@DNA nanoshell/DOX for 12 h and then irradiated with 980  
486 nm laser.

## 487 **6. Animal experiment**

### 488 **6.1 Obtain the tumor-bearing model**

489 The *in vivo* therapeutic efficacy of the proposed nanotheranostic agent were evaluated with the  
490 animal experiment. And the animal care and handling procedures were reviewed and approved  
491 by the Animal Care and Use Committee of Linyi University. To obtain the tumor-bearing  
492 model, the right leg of purchased Balb/c nude mouse (6 weeks, around 20 g) was injected with  
493 around  $1 \times 10^6$  cancer cells to grow the tumor. The experiment started when the tumor section  
494 would grow to the tumor volume of 120-150 mm<sup>3</sup>. Tumor-bearing nude mice were randomly  
495 into six or groups and each group contained five parallel mouse mode.

### 496 **6.2 In vivo biodistribution and metabolism of the prepared nanotheranostic agent**

497 The *in vivo* biodistribution and metabolism of the prepared nanotheranostic agent,  
498 UCNPs@mSiO<sub>2</sub>@PAH@DNA nanoshell/DOX, in mice were investigated by using  
499 fluorescence bioimaging. As the tumor volume reached to around 300 mm<sup>3</sup>, the mice were  
500 administered with an intravenous injection of the prepared nanotheranostic agent at the dose of  
501 2.0 mg/mL (50 μL), and then subjected to fluorescence imaging using a IVIS Lumina Series III  
502 at different time. As shown in Figure S24a, a strong fluorescence signal in the tumor area and  
503 lung was observed after 4 h. Then, the fluorescence intensity of the prepared nanotheranostic  
504 agent in mice lung was gradually increased from 4 h to 12 h, and gradually decreased.  
505 Meanwhile, the fluorescence intensity of the prepared nanotheranostic agent in mice kidney  
506 was increased and reached its maximum at 24 h. After that, the mice kidney displayed obvious  
507 decreased fluorescence intensity while the tumor section could maintain the strong intensity at  
508 48 h due to the enhanced permeability and retention effect (EPR). At 48 h post administration,  
509 the nude mice were sacrificed to obtain the tumor and normal organs for the further *in vivo*  
510 fluorescence imaging. The strongest fluorescence signals were observed at the tumor site and  
511 lung compared with other normal organs (Figure S24b). Thus, the results above indicated that  
512 the prepared nanotheranostic agent could accumulate in the tumor section via  
513 reticuloendothelial systems (RES) absorption and further metabolized in lung, kidney and  
514 spleen possibly by the way of feces and urine.<sup>9</sup>

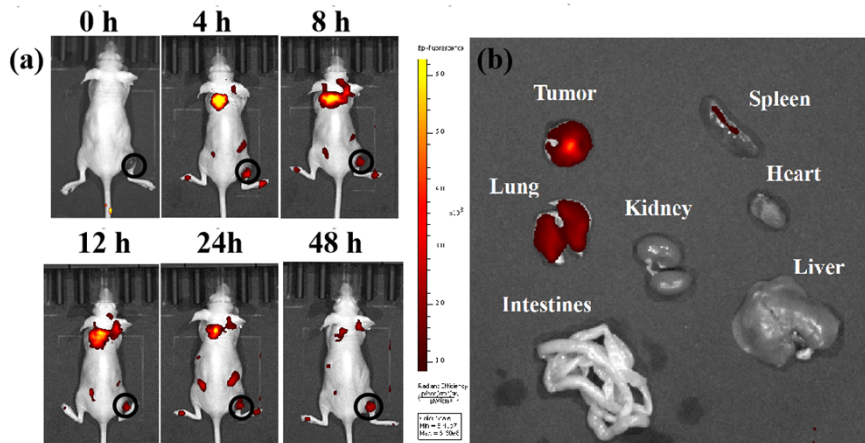

515

516 Figure S24: (a) *In vivo* fluorescence imaging and biodistribution of nude mice bearing tumors at different  
 517 time points after intravenous injection of the prepared nanotheranostic agent (the blank ring pointed out the  
 518 tumor location in mice); (b) fluorescence imaging of mice main organs after treated with the prepared  
 519 nanotheranostic agent for 48 h. The fluorescence information was recorded in the wavelength range of 500-  
 520 570 nm under the excitation of 980 nm laser.

### 521 6.3 *In vivo* therapeutic efficacy assay

522 Different treatments was designed and each group contained five parallel mice. The designed  
 523 treatments were as follows: (A) only injected with PBS; (B) laser irradiation alone; (C) only  
 524 injected with the control nanomaterial UCNPs@mSiO<sub>2</sub>@PAH@DNA nanoshell; (D) only  
 525 injected with the photodynamic nanotheranostic agent, UCNPs@mSiO<sub>2</sub>/MB@PAH and then  
 526 irradiated; (E) injected with the chemotherapy agent, UCNPs@mSiO<sub>2</sub>@PAH@DNA  
 527 nanoshell/DOX; (F) injected with the final nanotheranostic agent and then irradiated. The  
 528 experiment operation procedure was as followed. The prepared nanotheranostic agent (50 μL,  
 529 2.0 mg/mL) was injected into the tumor section. After overnight, 980 nm laser was used to  
 530 irradiate the tumor section for 4 min (1.5 W/cm<sup>2</sup>, 1 min interval). Then, the tumor volume was  
 531 calculated every two days based on the equation  $V = \text{length} \times \text{width}^2 / 2$ . Considering its  
 532 metabolism, the prepared nanotheranostic agent was injected into the tumor section and  
 533 irradiated with the laser again. After recorded its tumor changes over a period for 13 days, the  
 534 mouse was sacrificed to obtain the tumor section and main organs which were sliced for the  
 535 following immuno-staining analysis including hematoxylin and eosin (H&E) staining, TUNEL  
 536 staining and Caspase-3 staining.



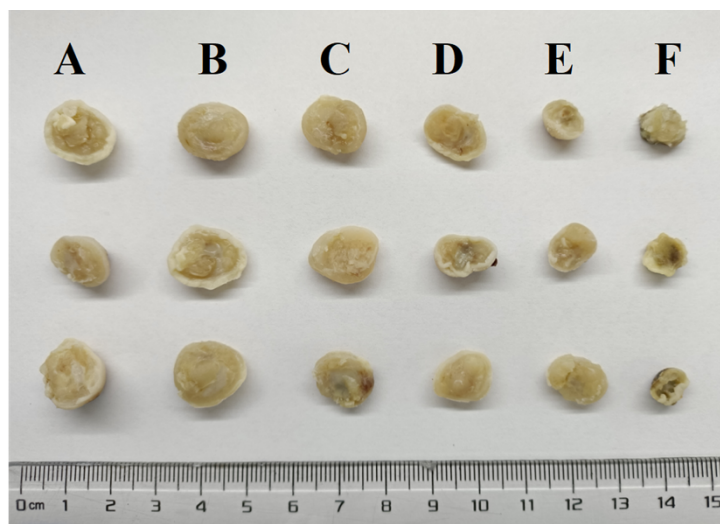

537

538 Figure S25: Photographs of the dissected tumor section on the thirteen days with different treatments.

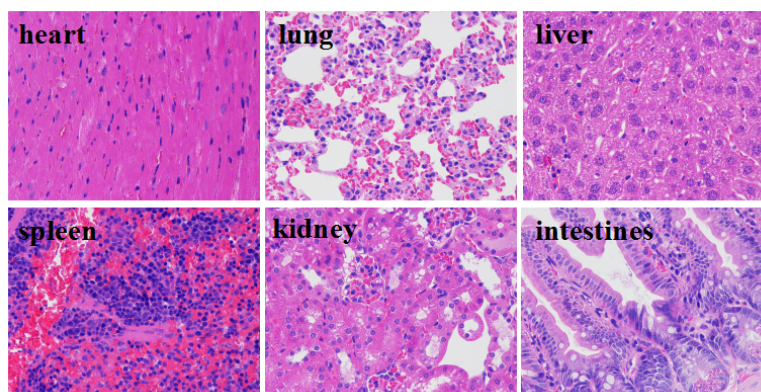

539

540 Figure S26: Bio-toxicity investigation of the prepared UCNPs@mSiO<sub>2</sub>@PAH@DNA nanoshell/DOX  
541 nanotheranostic agent to the main organs.

## 542 Reference

- 543 1. (a) X. Y. Song, Z. H. Yue, T. T. Hong, Z. H. Wang and S. S. Zhang, *Anal. Chem.*, 2019, **91**, 8549; (b) X.  
544 Y. Song, Z. H. Yue, J. Y. Zhang, Y. X. L. Jiang, Z. H. Wang and S. S. Zhang, *Chem. Eur. J.*, 2018, **24**, 6458.  
545
- 546 2. J. N. Liu, W. B. Bu and J. L. Shi, *Acc. Chem. Res.*, 2015, **48**, 1797.
- 547 3. J. N. Liu, W. B. Bu, S. J. Zhang, F. Chen, H. Y. Xing, L. M. Pan, L. P. Zhou, W. J. Peng and J. L. Shi,  
548 *Chem. Eur. J.*, 2012, **18**, 2335.
- 549 4. (a) V. Muhr, C. Würth, M. Kraft, M. Buchner, A. J. Baeumner, U. Resch-Genger and T. Hirsch, *Anal.*  
550 *Chem.*, 2017, **89**, 4868; (b) L. Mattsson, K. D. Wegner, N. Hildebrandt and T. Soukka, *RSC Adv.*, 2015, **5**,  
551 13270.
- 552 5. B. Wu, Z. Q. Cao, Q. Zhang and G. J. Wang, *Sensors and Actuators B: Chemical*, 2018, **255**, 2853.
- 553 6. (a) D. C. Wimalachandra, Y. Li, J. L. Liu, S. Shikha, J. Zhang, Y. C. Lim and Y. Zhang, *ACS Appl. Mater.*  
554 *Interfaces*, 2019, **11**, 37513; (b) H. Zhu, J. H. Deng, Y. Y. Yang, Y. F. Li, J. C. Shi, J. K. Zhao, Y. Deng, X.  
555 C. Chen and W. Z. Yang, *Colloid Surface B.*, 2019, **180**, 401; (c) Z. G. Teng, S. J. Wang, X. D. Su, G. T.

556 Chen, Y. Liu, Z. M. Luo, W. Luo, Y. X. Tang, H. X. Ju, D. Y. Zhao and G. M. Lu, *Adv. Mater.*, 2014, **26**,  
557 3741.

558 7. (a) C. Zhang, W. H. Chen, L. H. Liu, W. X. Qiu, W. Y. Yu and X. Z. Zhang, *Adv. Funct. Mater.*, 2017,  
559 **27**, 1700626; (b) Y. Chong, C. Ge, G. Fang, X. Tian, X. Ma, T. Wen, W. G. Wamer, C. Chen, Z. Chai and J.  
560 J. Yin, *ACS Nano*, 2016, **10**, 8690.

561 8. (a) D. Yang, G. X. Yang, Q. Q. Sun, S. L. Gai, F. He, Y. L. Dai, C. N. Zhong and P. P. Yang, *Adv. Healthc.*  
562 *Mater.*, 2018, **7**, 1800042; (b) I. S. Turan, D. Yildiz, A. Turksoy, G. Gunaydin and E. U. Akkaya, *Angew.*  
563 *Chem.*, 2016, **128**, 2925; (c) F. Y. Li, Y. Du, J. N. Liu, H. Sun, J. Wang, R. Q. Li, D. Kim, T. Hyeon and D.  
564 S. Ling, *Adv. Mater.*, 2018, **30**, 1802808.

565 9. L. Q. Peng, X. Mei, J. He, J. K. Xu, W. K. Zhang, R. Z. Liang, M. Wei, D. G. Evans and X. Duan, *Adv.*  
566 *Mater.*, 2018, **30(16)**, 1707389.
